# Supplementary material for: CCL19: a novel prognostic chemokine modulates the tumor immune microenvironment and outcomes of cancers
Source: publisher site journal article supplement (doi:10.18632/aging.205184), 2023-11-08
Supplement: Supplementary file [file aging-v15i21-205184-supplementary-material-SD1.pdf]

**SUPPLEMENTARY FIGURES**

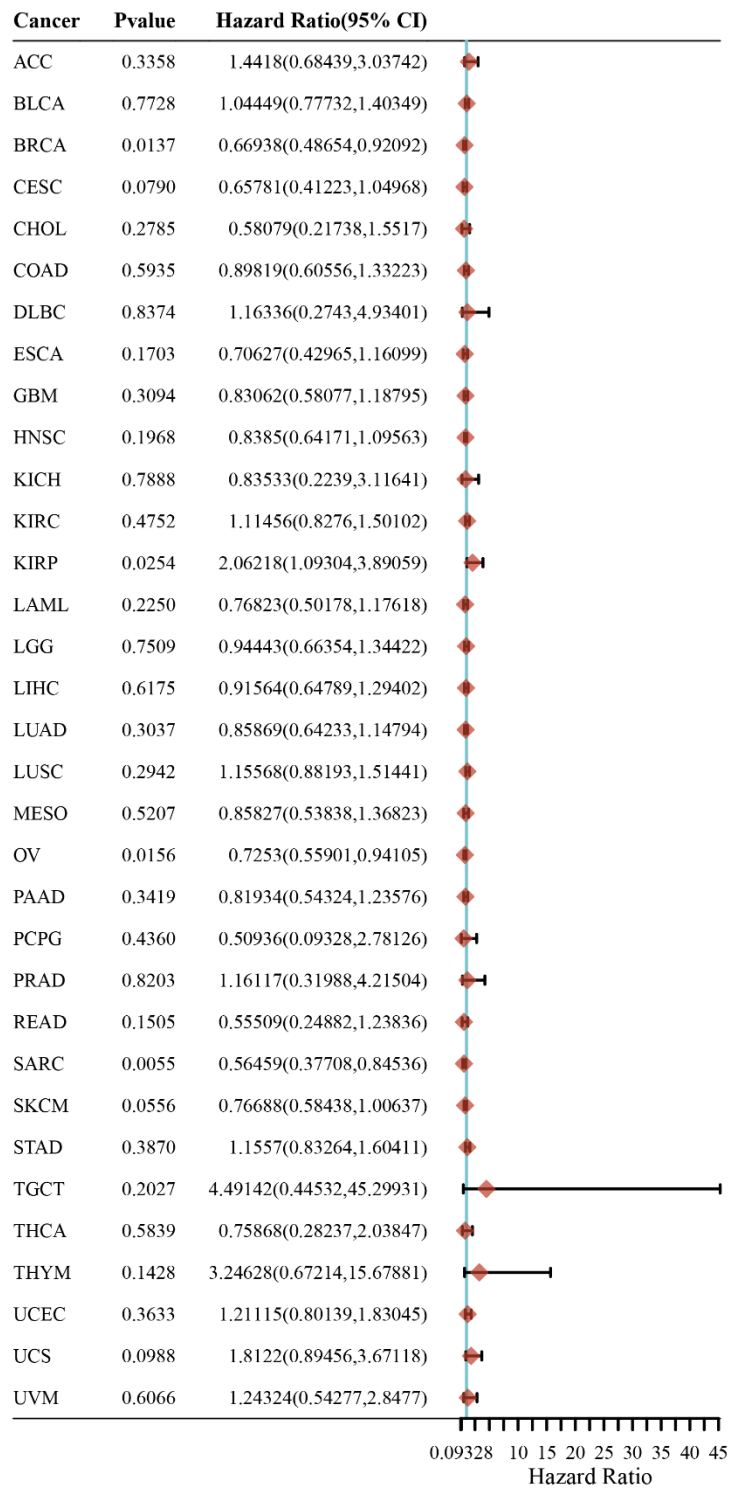

**Supplementary Figure 1. Univariate Cox regression analysis revealed clinical value of expression level of CCL19 in predicting OS for patients with cancers in a forest plot.**

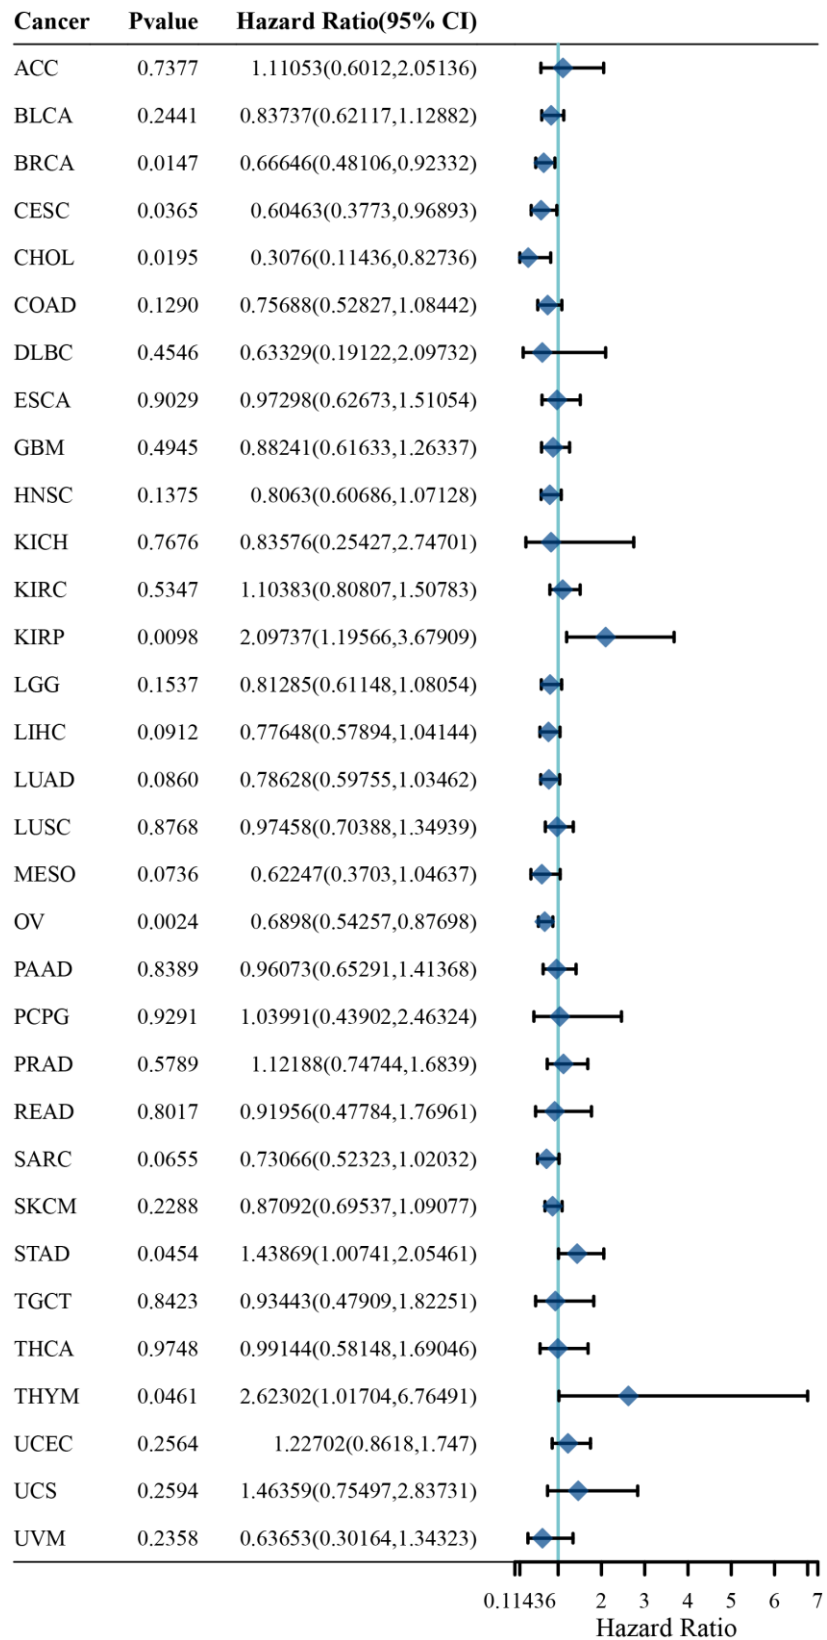

Supplementary Figure 2. Univariate Cox regression analysis revealed clinical value of expression level of CCL19 in predicting PFS for patients with cancers in a forest plot.

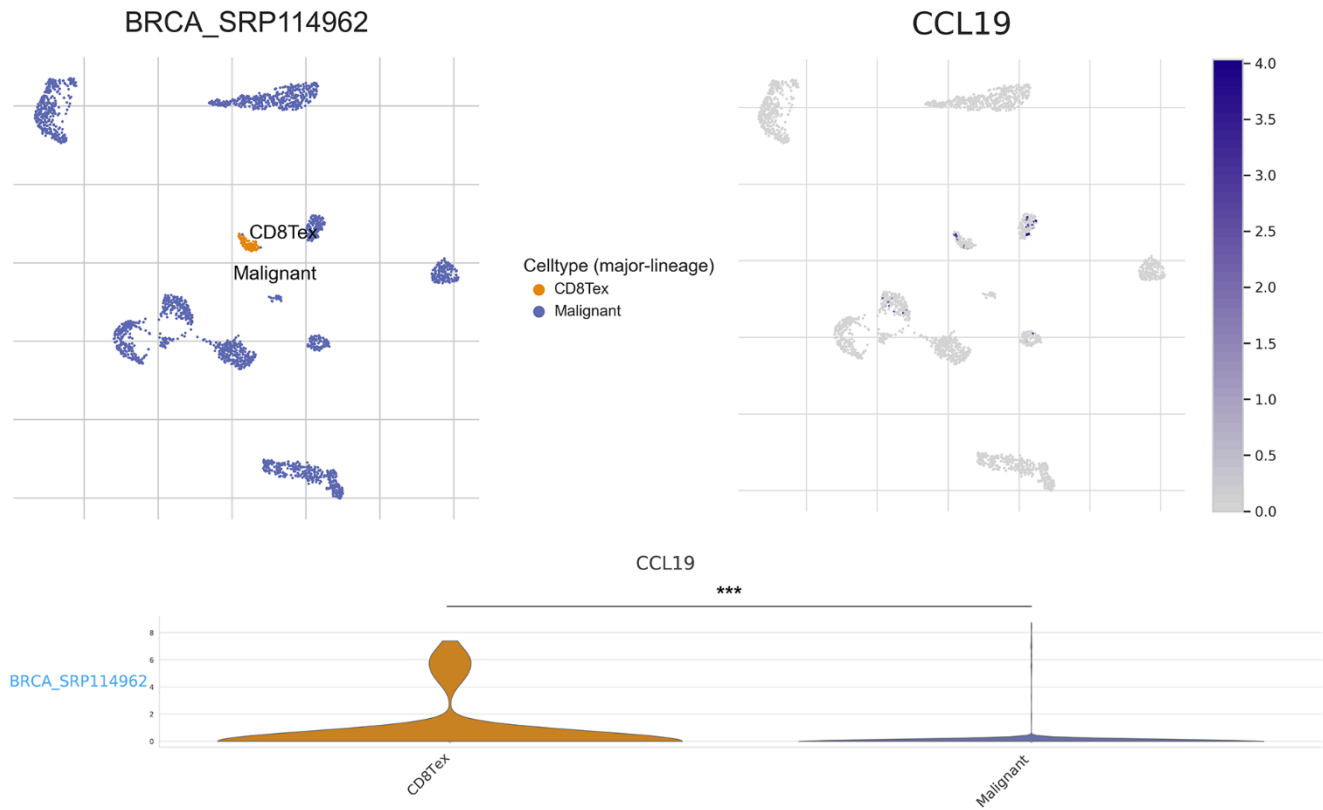

**Supplementary Figure 3.** Single-cell SRP114962 cohort was used to locate the CCL19 expression on CD8+ T cells. After identification of 2,472 cells from 8 BRCA patients, we found that CCL19 was mainly expressed in CD8+ T cells, and CD8+ T cell highly cover the tumor.
